# Supplementary material
Source: PubMed Central journal article supplement (PMC3906367)

## **Supplemental Material to:**

**Suvi Lappalainen, Kirsi Tamminen, Timo Vesikari  
and Vesna Blazevic**

**Comparative immunogenicity in mice of rotavirus VP6  
tubular structures and virus-like particles**

**2013; 9(9)**

**<http://dx.doi.org/10.4161/hv.25249>**

**[www.landesbioscience.com/journals/vaccines/article/25249](http://www.landesbioscience.com/journals/vaccines/article/25249)**

**Supplemental Figure 1.** Process chart for rotavirus rVP6 (1) and dl2/6-VLPs (2) production and purification.

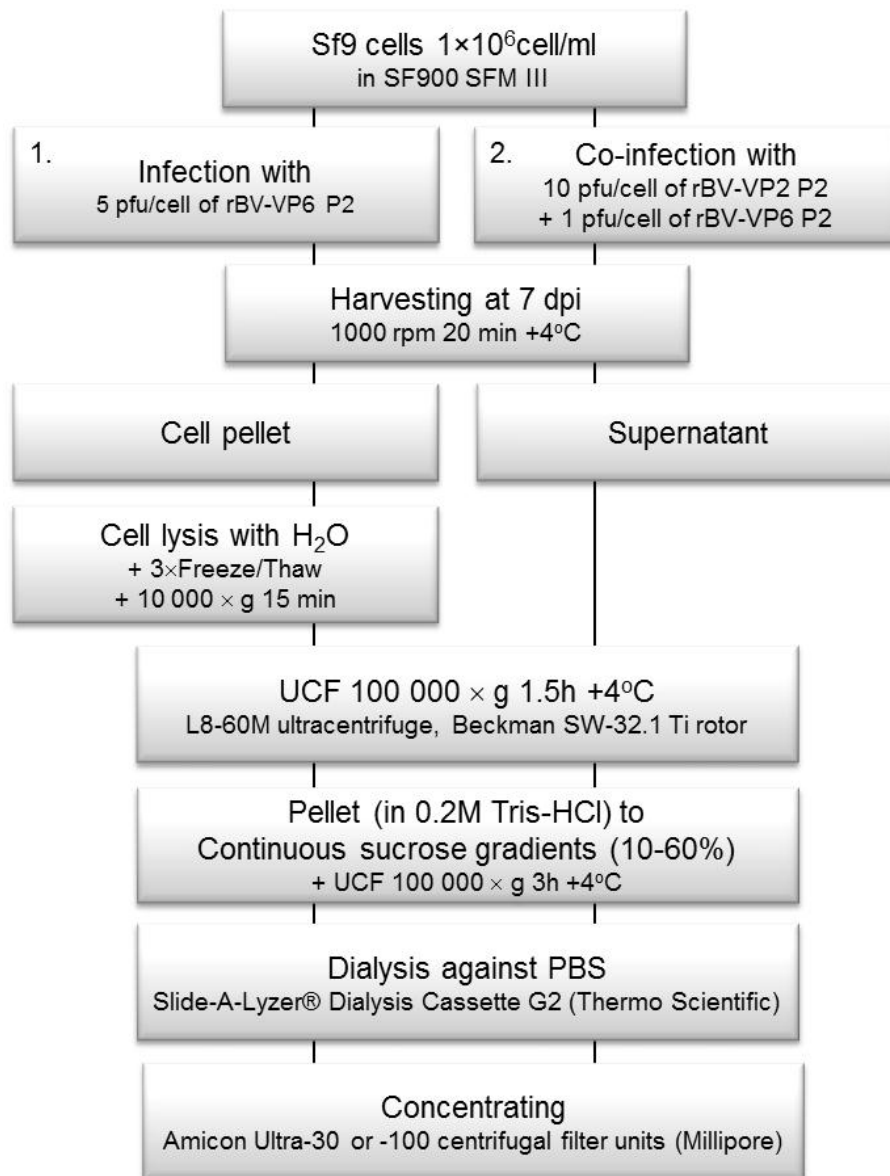

Supplement: hvi-9-1991-s01.pdf [file hvi-9-1991-s01.pdf]
